# Supplementary material for: The Abuse Potential of Novel Synthetic Phencyclidine Derivative 1-(1-(4-Fluorophenyl)Cyclohexyl)Piperidine (4′-F-PCP) in Rodents
Source: PubMed Central journal article supplement (PMC7369973; doi:10.3390/ijms21134631), 2020-06-29
Supplement: ijms-21-04631-s001.pdf [file ijms-21-04631-s001.pdf]

# Supplementary

## 1.0 mg/kg/infusion 4'-F-PCP

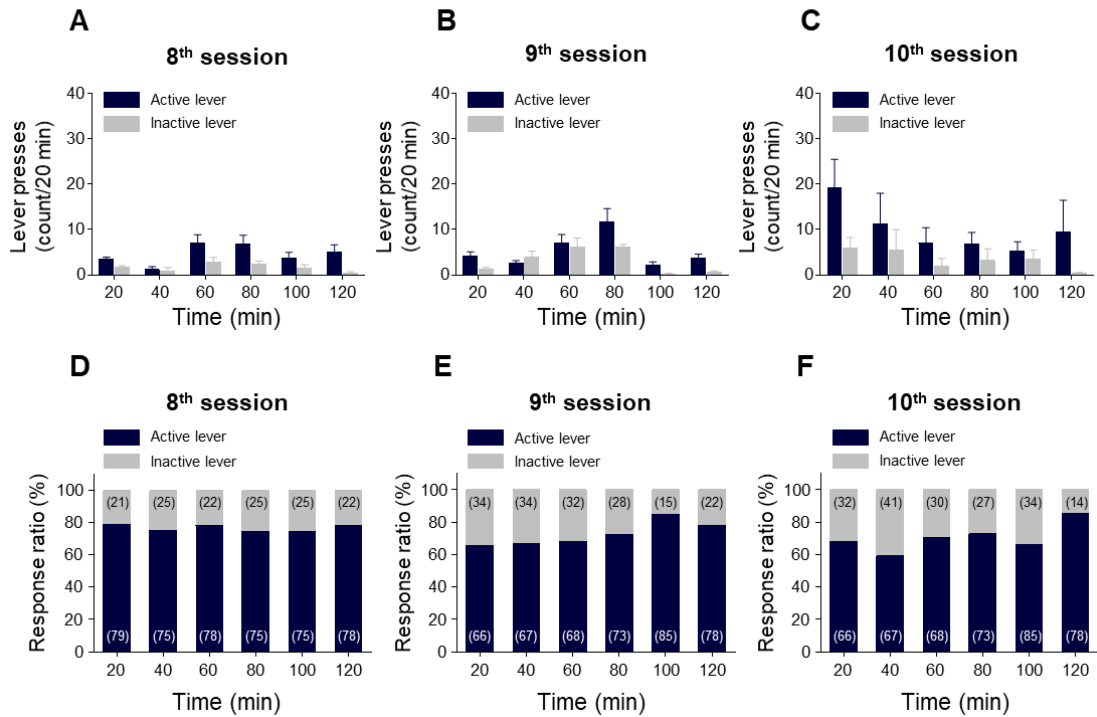

**Figure S1.** Lever presses and response ratio at 1.0 mg/kg/infusion 4'-F-PCP self-administered rats under FR2 schedules. (A–C) Temporal changes in active and inactive lever responses for 2 hr during the FR2 schedules (the 8<sup>th</sup>–10<sup>th</sup> sessions) at 1.0 mg/kg/infusion 4'-F-PCP self-administered rats. (D–F) Temporal changes in response ratio to active or inactive lever during the FR2 schedules. The numbers in parentheses indicate the response ratio for each lever.  $n = 6$  per group.

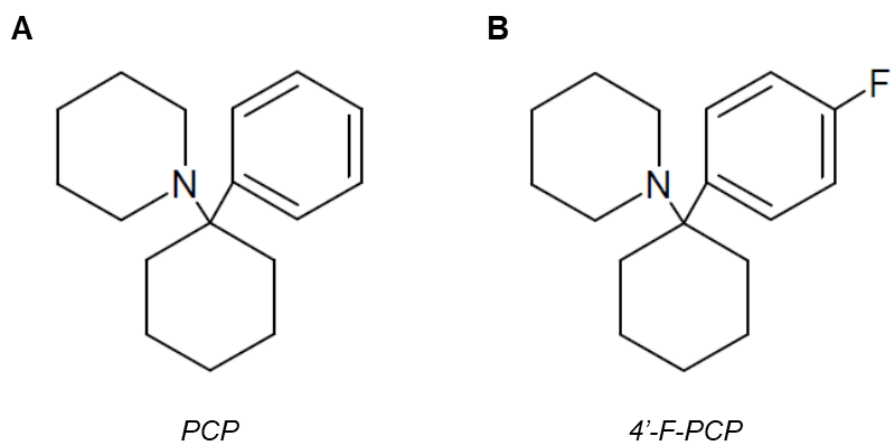

**Figure S2.** (A) The chemical structures of phencyclidine (PCP) and (B) 1-(1-(4-fluorophenyl)cyclohexyl)piperidine (4'-F-PCP).

**Modified 4 x 4 Latin square design**

|       |   | Group (mg/kg) |     |     |     |
|-------|---|---------------|-----|-----|-----|
|       |   | A             | B   | C   | D   |
| Order | 1 | 10            | SAL | 3   | 1   |
|       | 2 | SAL           | 10  | 1   | 3   |
|       | 3 | 3             | 1   | SAL | 10  |
|       | 4 | 1             | 3   | 10  | SAL |

**Figure S3.** Modified 4 × 4 Latin square design for open-field test.
